# Supplementary material
Source: MDPI journal article supplement (https://www.mdpi.com/2411-5142/5/4/94)
Supplement: s1 [file s1]

**Table S1. Characterization of the participants qualified for the study.**

| Participants | Age | Related pathology                                                                                                                                                                                                                                                     | Diagnosis                                                                                                                                                                                                                 |
|--------------|-----|-----------------------------------------------------------------------------------------------------------------------------------------------------------------------------------------------------------------------------------------------------------------------|---------------------------------------------------------------------------------------------------------------------------------------------------------------------------------------------------------------------------|
| P1           | 83  | Arterial hypertension, hypercholesterolemia, low vision (left eye), osteoporosis, depressive syndrome.                                                                                                                                                                | Slowed walking due to problems in the right malleolus. False memories and ideational exchanges that cause aggressive behaviour.                                                                                           |
| P2           | 66  | Secondary epilepsy, low vision (right eye), depressive syndrome, glaucoma (left eye), hypertension.                                                                                                                                                                   | Sometimes he presents delusional ideas with consequent behavioural disturbances.                                                                                                                                          |
| P3           | 72  | Diabetes mellitus and psychomotor slowdown, subdural hematoma regressed, prostatic hypertrophy, hypercholesterolemia.                                                                                                                                                 | Walking only with assistance such as feeding and toilet. Problems with swallowing, dysphagia.                                                                                                                             |
| P4           | 83  | Phlebitis in the lower limbs, hypertension, persecutory delusions, mild hypercholesterolemia, bilateral cataract.                                                                                                                                                     | Basic autonomy maintained only for feeding and walking. She begins with delusional thoughts, confusion and disorientation.                                                                                                |
| P5           | 84  | Bilateral low vision, hypertension, hypothyroidism.                                                                                                                                                                                                                   | Impaired language deficit, level of collaboration not adequate to the context. Disoriented.                                                                                                                               |
| P6           | 69  | Hyperphagia, chronic cerebral vasculopathy, hepatic steatosis.                                                                                                                                                                                                        | Total aphasia, muscle stiffness. Constant walking.                                                                                                                                                                        |
| P7           | 89  | Low vision (right eye), prostatic hypertrophy.                                                                                                                                                                                                                        | Behavioural disorders characterized by constant complaining and fake crying. Slow walking.                                                                                                                                |
| P8           | 84  | Hypercholesterolemia, sclero-hypertensive valvular heart disease. Wearing a pacemaker. Assumption of anticoagulants.                                                                                                                                                  | Walking with assistance. Behavioural disturbances and agitation. Basic autonomy totally compromised.                                                                                                                      |
| P9           | 82  | Hypertension                                                                                                                                                                                                                                                          | Alternate moments of psychomotor agitation with total apathy and non-participation in activities.                                                                                                                         |
| P10          | 92  | Arterial hypertension, hypertensive sclerotic heart disease, deforming spondylarthrosis, bilateral gonarthrosis, osteoporosis, chronic steatosis liver disease, chronic gastroduodenitis, irritable bowel and diverticulosis of the colon, atrial fibrillation in TA. | Apathetic. Slowed and assisted walking.                                                                                                                                                                                   |
| P11          | 72  | Arterial hypertension, tendon retractions for loss of consciousness since the 1980s                                                                                                                                                                                   | Fluent speech but not adequate in content. Mixture of words and thoughts, constructive and ideomotor apraxia, impaired executive functions. Ideational replacement of familiar faces, psychomotor agitation, hyperphagia. |
| P12          | 78  | Chronic vascular encephalopathy, thyroidectomy for goiter.                                                                                                                                                                                                            | All cognitive domains are totally compromised. Fluent speech but not adequate in form and content.                                                                                                                        |
| P13          | 72  | Cognitive decline with behavioural disorders.                                                                                                                                                                                                                         | Spatial disorientation, presence of persecutory delusions and hallucinations. Uncertain walking. Difficulty in understanding, impaired executive functions, attention deficit.                                            |

| Participants | Age | Related pathology                                                                                                                                         | Diagnosis                                                                                                                                                                                                                     |
|--------------|-----|-----------------------------------------------------------------------------------------------------------------------------------------------------------|-------------------------------------------------------------------------------------------------------------------------------------------------------------------------------------------------------------------------------|
| P14          | 75  | Revascularized ischemic heart disease, Parkinson disease.                                                                                                 | Wandering.                                                                                                                                                                                                                    |
| P15          | 85  | Hypertensive ischemic heart disease in the compensation phase, left femur arthroplasty, anxious syndrome, hearing loss.                                   | Spatial disorientation, non-fluent speech. Good level of collaboration always adequate even if with opposite traits. Alternatively, inclined to the practice of motor exercises.                                              |
| P16          | 78  | Right breast cancer, severe osteoporosis.                                                                                                                 | Collaborating, normal walking. Fluent speech                                                                                                                                                                                  |
| P17          | 88  | Arterial hypertension, hypercholesterolemia, osteoporosis, TIA carotid atheroma (left hemiparesis and dysarthria), hypoacusis.                            | Behavioural disturbances, insomnia, cooperation, fluent speech.                                                                                                                                                               |
| P18          | 79  | Coronary artery bypass grafting, sleeplessness at night, mood changes and hallucinatory episodes.                                                         | Apathetic. Lack of socialization skills, constructive apraxia, non-fluent speech.                                                                                                                                             |
| P19          | 82  | Hypercholesterolemia, assumption of oral anticoagulants, bilateral hypoacusis, hyperuricemia, heart disease, hypertension and ischemic subject, cataract. | ADL (activities of daily living) kept at the limits of sufficiency. Fair ability to follow calculations and sentence completion.                                                                                              |
| P20          | 88  | Sclero-degenerative heart disease, osteoporosis, hypovitaminosis B12, anaemia.                                                                            | Unstable walking, knees wobble, tendency to fall. Space-time disorientation. Collaborating but the level of socialization is not adequate.                                                                                    |
| P21          | 87  | Ischemic heart disease, carotid atherosclerosis, benign prostatic hypertrophy, irritability and behavioural disturbances. From 3 years in a wheelchair.   | Apathetic, uncooperative, he often closes his eyes and makes circular movements with his head<br>ADL (activities of daily living) kept for power only.                                                                        |
| P22          | 71  | Hypoacusis, insomnia, behavioural disorders, post head trauma aggression.                                                                                 | Adequate collaboration, fluent speech, daily activities maintained. Often fixed and absent gaze. Lack of socialization skills.                                                                                                |
| 23           | 80  | Hysterectomy and cholecystectomy, lumbar stenosis with multiple disc disease, depressive disorder.                                                        | Presence of behavioural disorders. Wandering, temporal disorientation, thought disturbances, apraxia, bradykinesia.                                                                                                           |
| 24           | 90  | Memory disorders.                                                                                                                                         | Collaborative, active, sociable. Deficit in space-time orientation and long-term memory.                                                                                                                                      |
| 25           | 79  | Memory deficit, verbal aggression, irritability, disorder of thinking and behaviour. The psychotic symptoms are linked to personality disorder.           | Collaborating, the behavioural symptomatology is kept under control by pharmacological and educational therapy. Autonomous walking. Disorientation. Good executive functions but presents ideomotor and constructive apraxia. |
| 26           | 84  | Bilateral hearing loss, hypertensive heart disease, diabetes mellitus (type 2).                                                                           | Temporal disorientation, slow walking and with external support. Moderate cognitive impairment.                                                                                                                               |
